# Supplementary material for: Effects of Monomeric and Oligomeric Flavanols on Kidney Function, Inflammation and Oxidative Stress in Runners: A Randomized Double-Blind Pilot Study
Source: MDPI journal article supplement (doi:10.3390/nu12061634), 2020-06-01

**Table S1.** Blood pressure and heart rate in recreational runners before and after use of 400-mg single-dose ibuprofen followed by completion of the half-marathon

| Characteristics       | Placebo, n=25 |              |                       | MOF-VVPP, n=29 |                           |                       | <i>p</i> <sup>#</sup> |
|-----------------------|---------------|--------------|-----------------------|----------------|---------------------------|-----------------------|-----------------------|
|                       | <i>Before</i> | <i>After</i> | <i>p</i> <sup>*</sup> | <i>Before</i>  | <i>After</i> <sup>*</sup> | <i>p</i> <sup>*</sup> |                       |
| Blood pressure, mm Hg |               |              |                       |                |                           |                       |                       |
| Systolic              | 142±17        | 116±13       | <0.0001               | 148±25         | 117±14                    | <0.0001               | 0.801                 |
| Diastolic             | 84±12         | 68±9         | <0.0001               | 86±12          | 67±9                      | <0.0001               | 0.928                 |
| HR, bmp               | 112±14        | 97±11        | 0.0005                | 111±16         | 95±16                     | 0.0007                | 0.632                 |

Blood pressure and heart rate were assessed before and after the use of 400 mg single-dose ibuprofen followed by completion of the half-marathon. Runners were supplemented with MOF-VVPP (200 mg/d) or placebo for 14 days preceding the measurements and the ibuprofen/half-marathon challenge. \* - denoted the *p* values for the comparison “before” versus “after” values within the group by paired *t*-test; # - denotes the *p* value for the comparison of the “after” values between both study groups by unpaired *t*-test. Bpm – beats per minute, HR – heart rate, MOF-VVPP – monomeric and oligomeric flavanols isolated from *Vitis vinifera* L. seeds and *Pinus pinaster* L. bark.

**Table S2.** Parameters assessed with the urine dipstick test in recreational runners before and after use of 400-mg single-dose ibuprofen followed by completion of the half-marathon

| Parameter        | Placebo, n=25 |              | MOF-VVPP, n=29 |              | <i>p</i> * |
|------------------|---------------|--------------|----------------|--------------|------------|
|                  | <i>Before</i> | <i>After</i> | <i>Before</i>  | <i>After</i> |            |
| Leukocytes       |               |              |                |              |            |
| 2+               | -             | -            | 1 (3.4)        | -            | 1.000      |
| Urobilinogen     |               |              |                |              |            |
| 1+               | -             | 2 (8.0)      | 1 (3.4)        | 1 (3.4)      | 0.535      |
| 2+               | -             | 1 (4.0)      | -              | 1 (3.4)      |            |
| Blood            |               |              |                |              |            |
| 0.5+             | 4 (16.0)      | 11 (44.0)    | 6 (20.4)       | 8 (27.2)     |            |
| 1+               | -             | 1 (4.0)      | -              | 2 (6.8)      | 0.110      |
| 2+               | 1 (4.0)       | 2 (8.0)      | -              | 1 (3.7)      |            |
| 3+               | -             | 2 (8.0)      | -              | -            |            |
| Bilirubin        |               |              |                |              |            |
| 1+               | 3 (12.0)      | 4 (16.0)     | 3 (10.2)       | 4 (13.6)     | 0.822      |
| Ketones          |               |              |                |              |            |
| 1+               | -             | 4 (16.0)     | -              | -            | 0.116      |
| Glucose          |               |              |                |              |            |
| 0.5+             | -             | 1 (4.0)      | -              | -            |            |
| 1+               | -             | -            | -              | 2 (6.8)      | 0.471      |
| 2+               | -             | -            | -              | 1 (3.4)      |            |
| 3+               | -             | 1 (4.0)      | -              | -            |            |
| Protein          |               |              |                |              |            |
| 0.5+             | 2 (8.0)       | 8 (32.0)     | -              | 12 (44.4)    |            |
| 1+               | -             | 6 (24.0)     | 1 (3.7)        | 4 (13.6)     | 0.319      |
| 2+               | -             | 5 (20.0)     | -              | 3 (10.2)     |            |
| 3+               | -             | -            | -              | 1 (3.4)      |            |
| pH               |               |              |                |              |            |
| 5                | 15 (60.0)     | 15 (60.0)    | 21 (71.4)      | 22 (74.8)    |            |
| 6                | 3 (12.0)      | 10 (41.7)    | 6 (20.4)       | 7 (23.8)     | 0.215      |
| 7                | 5 (20.0)      | -            | 1 (3.4)        | -            |            |
| 8                | 2 (8.0)       | -            | -              | -            |            |
| Specific gravity |               |              |                |              |            |
| 1.000            | -             | -            | 1 (3.4)        | -            |            |
| 1.005            | 3 (12.0)      | 1 (4.0)      | 6 (20.4)       | 3 (10.2)     |            |
| 1.010            | 8 (32.0)      | 4 (16.0)     | 8 (27.2)       | 3 (10.2)     | 0.080      |
| 1.015            | 3 (12.0)      | 2 (8.0)      | 7 (23.8)       | 5 (17)       |            |
| 1.020            | 6 (24.0)      | 1 (4.0)      | 2 (6.8)        | 7 (23.8)     |            |
| 1.025            | 1 (4.0)       | 4 (16.0)     | 1 (3.4)        | 3 (10.2)     |            |
| 1.030            | 4 (16.0)      | 13 (54.0)    | 4 (13.6)       | 6 (20.4)     |            |
| >1.030           | -             | 1 (4.0)      | -              | 1 (3.4)      |            |

Data presented as absolute numbers (percentage) per group. Testing was performed in urine samples obtained before and after the use of 400 mg single-dose ibuprofen followed by completion of the half-marathon. Runners were supplemented with MOF-VVPP (200 mg/d) or placebo for 14 days preceding urine sampling and the ibuprofen/half-marathon challenge. \* - denotes the *p* value for the comparison of the differences between the groups by Mann-Whitney U test. Nitrite was not found in any of the samples. MOF-VVPP – monomeric and oligomeric flavanols isolated from *Vitis vinifera* L. seeds and *Pinus pinaster* L. bark.

**Table S3.** Urinary biomarkers in recreational runners before and after use of 400-mg single-dose ibuprofen followed by completion of the half-marathon

| Urinary biomarker    | Placebo              |                                    | MOF-VVPP            |                                   | <i>p</i> *   |
|----------------------|----------------------|------------------------------------|---------------------|-----------------------------------|--------------|
|                      | <i>Before</i>        | <i>After</i>                       | <i>Before</i>       | <i>After</i>                      |              |
| uNGAL, pg/mL         | 12.8<br>[10.0-22.2]  | 25.5 <sup>a</sup><br>[15.3-42.0]   | 10.0<br>[10.0-14.9] | 16.5<br>[10.1-39.7]               | 0.156        |
| IL-6, pg/mL          | 0.35<br>[0.15-1.24]  | 3.57 <sup>a</sup><br>[1.56-8.00]   | 0.25<br>[0.13-0.76] | 1.46 <sup>a</sup><br>[0.54-4.15]  | <b>0.032</b> |
| IL-8, pg/mL          | 7.09<br>[2.88-16.31] | 20.37 <sup>b</sup><br>[9.75-40.51] | 5.52<br>[1.25-9.44] | 8.22 <sup>b</sup><br>[3.22-36.14] | 0.125        |
| TNF $\alpha$ , pg/mL | 1.85<br>[1.55-2.81]  | 4.59 <sup>a</sup><br>[2.51-6.25]   | 2.14<br>[1.28-3.23] | 2.74 <sup>c</sup><br>[2.19-4.18]  | 0.173        |
| IL-18, mg/mL         | 6.62<br>[2.25-11.34] | 8.00<br>[3.77-19.63]               | 4.15<br>[1.97-7.80] | 8.51<br>[2.38-15.75]              | 0.406        |
| MDA, $\mu$ M         | 1.23<br>[0.60-3.00]  | 5.85 <sup>a</sup><br>[2.19-8.39]   | 0.95<br>[0.44-1.62] | 3.78 <sup>a</sup><br>[1.69-6.47]  | 0.260        |
| TEAC, $\mu$ M        | 4206<br>[1933-6973]  | 7675 <sup>b</sup><br>[4290-11999]  | 2946<br>[1520-4978] | 6290 <sup>b</sup><br>[3294-9890]  | 0.489        |
| TEAC corr., $\mu$ M  | 2269<br>[1149-4093]  | 5344 <sup>a</sup><br>[3313-8872]   | 1814<br>[891-3490]  | 4639 <sup>a</sup><br>[2354-6379]  | 0.441        |

Data are presented as median and [25% - 75% percentiles]. Testing was performed in urine samples obtained before and after the use of 400 mg single-dose ibuprofen followed by completion of the half-marathon. Runners were supplemented with MOF-VVPP (200 mg/d) or placebo for 14 days preceding urine sampling and the ibuprofen/half-marathon challenge. Statistical significant differences within the groups were assessed by the Wilcoxon matched-pairs signed rank test, <sup>a</sup>*p*<0.05, <sup>b</sup>*p*<0.01, <sup>c</sup>*p*<0.001. Statistically significant differences between the test groups were assessed by the Mann-Whitney U test. During the comparison of the “before” values between the groups no significant differences were noted. \* - denotes the *p* value for the comparison of the “after” values. IL – interleukin, MDA – malonic dialdehyde, MOF-VVPP - monomeric and oligomeric flavanols isolated from *Vitis vinifera* L. seeds and *Pinus pinaster* L. bark, TEAC – trolox equivalent antioxidant capacity, TEAC corr. – TEAC corrected for the concentrations of uric acid, TNF $\alpha$  – tumor necrosis factor  $\alpha$ , uNGAL – urinary neutrophil gelatinase-associated lipocalin.

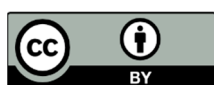

Supplement: s1 [file s1]
